# Supplementary material for: Functionalised mesoporous silica: a good opportunity for controlled peptide oligomerisation
Source: Royal Society of Chemistry journal article supplement (doi:10.1039/c0jm04492j), 2011-01-01
Supplement: c0jm04492j.pdf [file c0jm04492j.pdf]

## Supplementary Information

# Functionalised mesoporous silica: A good opportunity for controlled peptide oligomerisation

Gilles Subra<sup>\*a</sup>, Ahmad Mehdi<sup>\*b</sup>, Christine Enjalbal<sup>a</sup>, Muriel Amblard<sup>a</sup>, Luc Brunel<sup>a</sup>, Robert Corriu<sup>b</sup> and Jean Martinez<sup>a</sup>

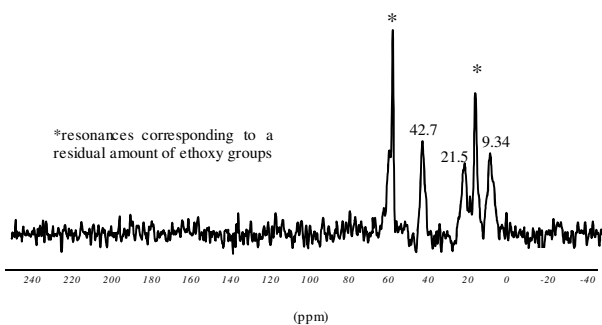

S1. <sup>13</sup>C CP/MAS NMR Spectrum of OMS at 0.8 mmol g<sup>-1</sup> of aminopropyl groups.

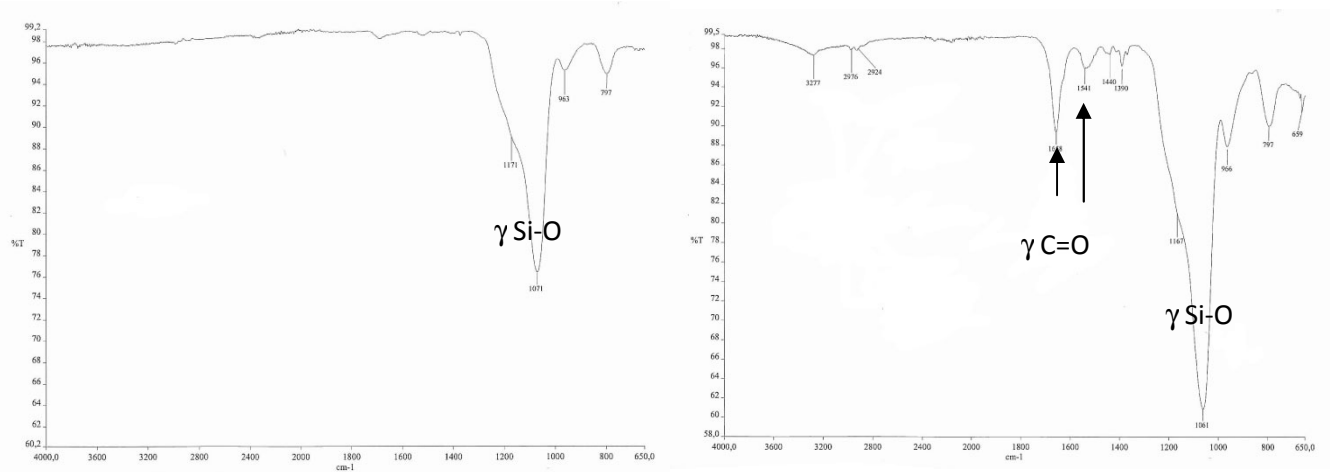

S2. IR spectra of amino OMS (0.4 mmol/g) before (left) and after (right) Ala NCA treatment.

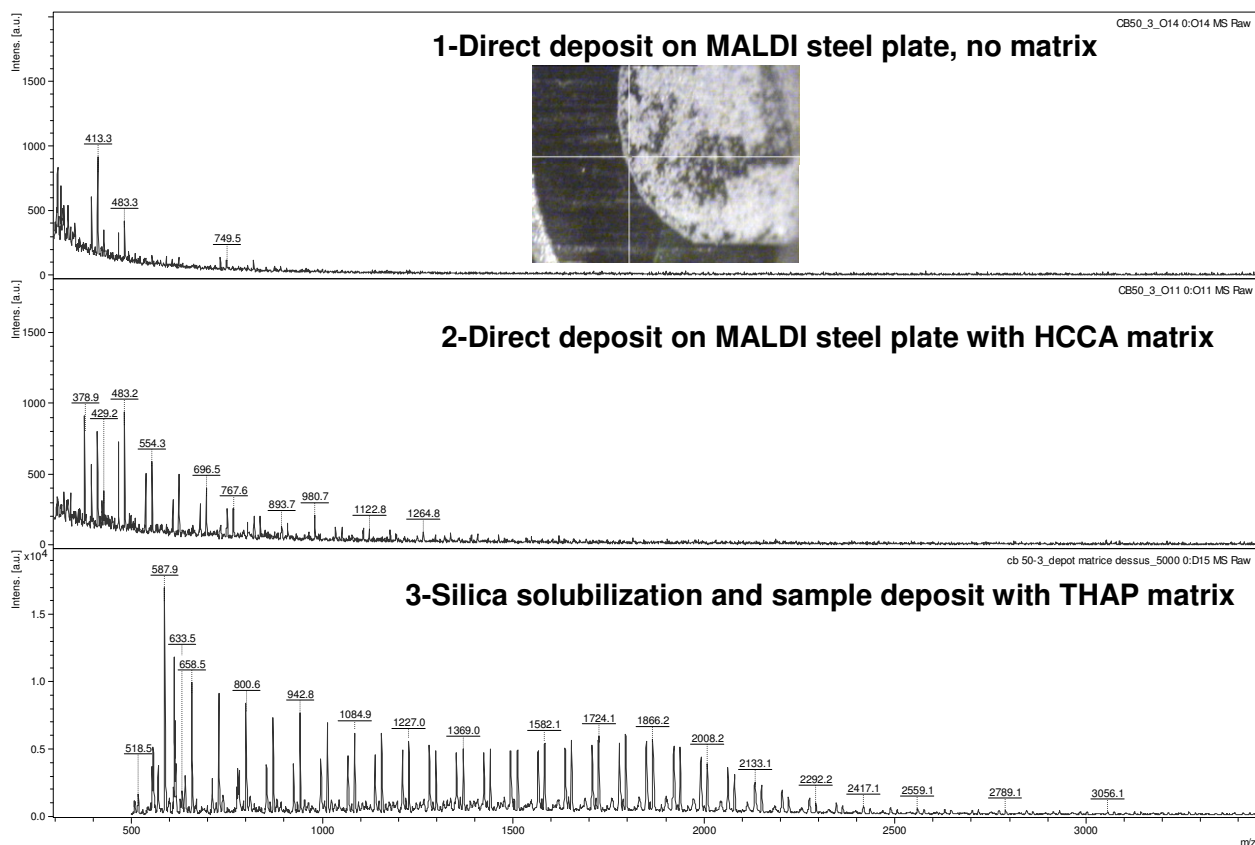

S3. LDI MS spectra of exp. 6 acquired under three different conditions: 1-Direct deposit of the functionalized mesoporous silica on the MALDI steel plate (Heterogeneous deposit as shown in insert, no matrix), 2-Direct deposit of the functionalized mesoporous silica on the MALDI steel plate with a prespotted HCCA matrix solution, 3- Functionalized mesoporous silica solubilization and sample deposit on MALDI steel plate with THAP matrix.

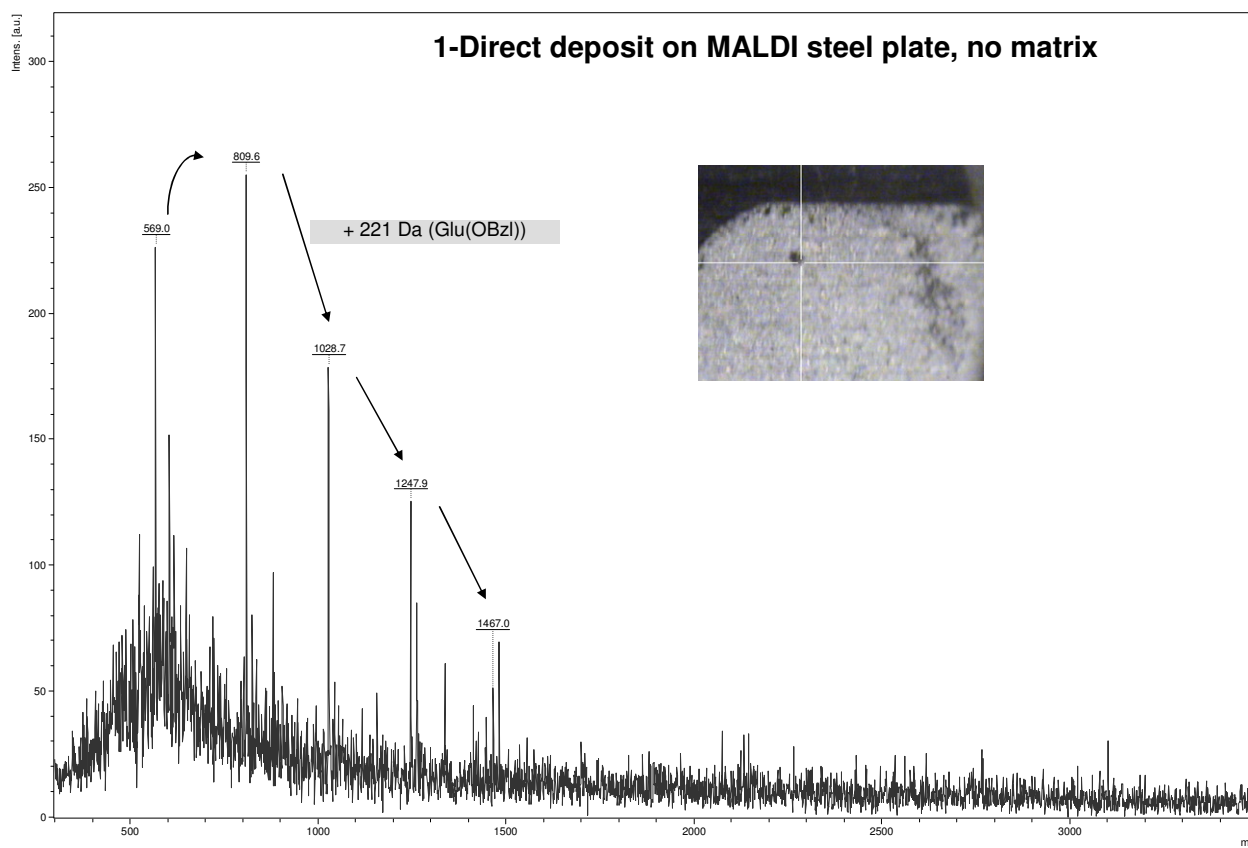

**S4.** LDI MS spectrum of exp. 19 acquired under three different conditions: only one condition led to successful analysis: 1-Direct deposit of the functionalized mesoporous silica on the MALDI steel plate (Heterogeneous deposit as shown in insert, no matrix),

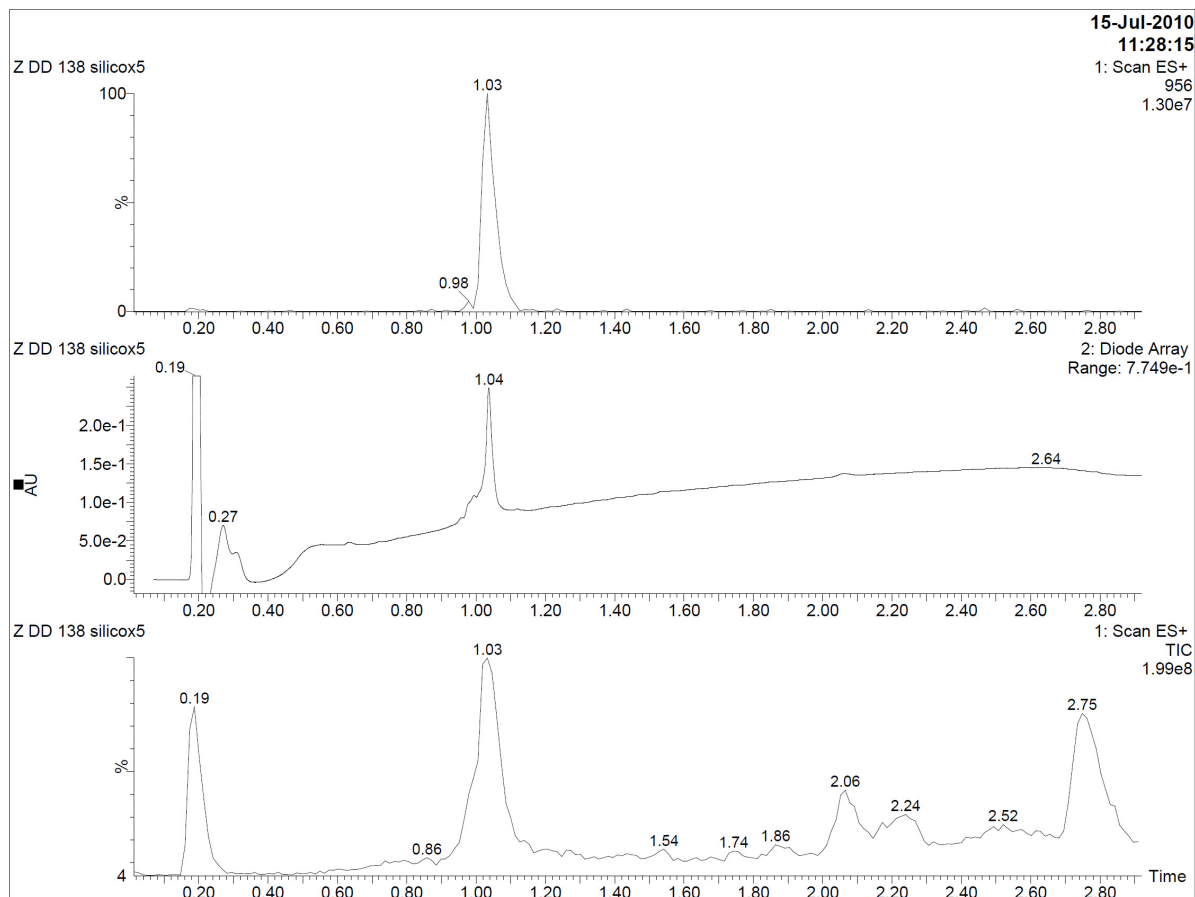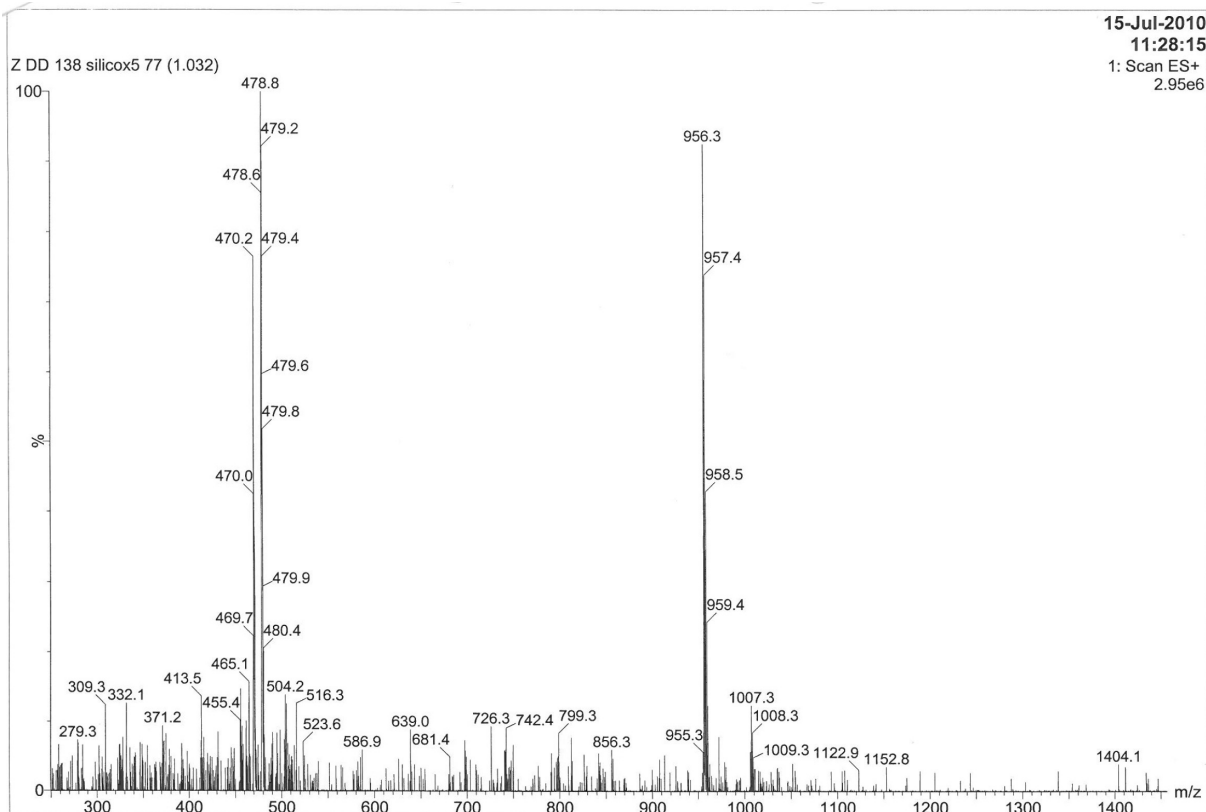

S5. LC/MS analysis of CCAP oxidized with functionalised OMS 14' (5eq) after 12 hours.
